# Supplementary material for: (LA)-MC-ICPMS/MS measurement of Sr radiogenic isotope ratios
Source: Royal Society of Chemistry journal article supplement (doi:10.1039/d3ja00358b), 2024-01-01
Supplement: d3ja00358b1.pdf [file d3ja00358b1.pdf]

## Supplementary information for :

### (LA)-MC-ICPMS/MS measurement of Sr radiogenic isotope ratios

Philippe Télouk and Vincent Balter

**Table S1** : Results of Sr isotope analyses. The configuration (Config.) refers to a combination of laboratory and instrument which is given in Table 3. Measurements using laser ablation have been done once only.

| Exp. #    | Sample ID        | Config.          | Rb<br>αg/g | Sr<br>αg/g | Certified                       |         |  | Measured solution                 |         |         | Measured solution               |       |   | Measured laser                    |         |         | Measured laser                  |         |         |         |         |
|-----------|------------------|------------------|------------|------------|---------------------------------|---------|--|-----------------------------------|---------|---------|---------------------------------|-------|---|-----------------------------------|---------|---------|---------------------------------|---------|---------|---------|---------|
|           |                  |                  |            |            | $^{87}\text{Sr}/^{86}\text{Sr}$ | ± 2SD   |  | $^{87}\text{SrF}/^{86}\text{SrF}$ | ± 2SD   | n       | $^{87}\text{Sr}/^{86}\text{Sr}$ | ± 2SD | n | $^{87}\text{SrF}/^{86}\text{SrF}$ | ± 2SD   |         | $^{87}\text{Sr}/^{86}\text{Sr}$ | ± 2SD   |         |         |         |
| #1        | BCR-1            | §2a              | 47         | 330        | 0.70501                         | 0.00007 |  | 0.70502                           | 0.00008 | 3       |                                 |       |   |                                   |         |         |                                 |         |         |         |         |
|           | BHVO-1           | §2a              | 10         | 395        | 0.70347                         | 0.00007 |  | 0.70344                           | 0.00007 | 3       |                                 |       |   |                                   |         |         |                                 |         |         |         |         |
|           | BE-N             | §2a              | 47         | 1380       | 0.70385                         | 0.00024 |  | 0.70404                           | 0.00008 | 3       |                                 |       |   |                                   |         |         |                                 |         |         |         |         |
|           | JB-1a            | §2a              | 39         | 442        | 0.70411                         | 0.00002 |  | 0.70410                           | 0.00002 | 3       |                                 |       |   |                                   |         |         |                                 |         |         |         |         |
|           | JA-3             | §2a              | 36         | 290        | 0.70417                         | 0.00001 |  | 0.70415                           | 0.00004 | 3       |                                 |       |   |                                   |         |         |                                 |         |         |         |         |
|           | DNC-1            | §2a              | 4.0        | 144        | 0.70582                         | 0.00002 |  | 0.70582                           | 0.00009 | 3       |                                 |       |   |                                   |         |         |                                 |         |         |         |         |
|           | W2               | §2a              | 21         | 193        | 0.70698                         | 0.00007 |  | 0.70696                           | 0.00006 | 3       |                                 |       |   |                                   |         |         |                                 |         |         |         |         |
|           | BIR-1            | §2a              | 0.20       | 108        | 0.70312                         | 0.00008 |  | 0.70307                           | 0.00010 | 3       |                                 |       |   |                                   |         |         |                                 |         |         |         |         |
|           | JG-3             | §2a              | 66         | 375        | 0.70539                         | 0.00003 |  | 0.70529                           | 0.00009 | 3       |                                 |       |   |                                   |         |         |                                 |         |         |         |         |
|           | AGV2             | §2a              | 68         | 658        | 0.70399                         | 0.00005 |  | 0.70394                           | 0.00010 | 3       |                                 |       |   |                                   |         |         |                                 |         |         |         |         |
|           | #2               | AZE2             | §3b<br>§4  | 0.17       | 354                             |         |  |                                   | 0.70895 | 0.00001 | 3                               |       |   |                                   |         |         | 0.70937                         | 0.00035 |         |         |         |
|           |                  | BA1              | §2b        | 0.19       | 969                             |         |  |                                   |         |         |                                 |       |   |                                   |         | 0.70892 | 0.00012                         |         |         | 0.70922 | 0.00017 |
| §3a<br>§4 |                  |                  |            |            |                                 |         |  |                                   |         | 0.70916 | 0.00001                         | 3     |   |                                   |         |         |                                 |         |         |         |         |
| BRM       |                  | §2b              | 0.09       | 315        |                                 |         |  |                                   |         |         |                                 |       |   |                                   | 0.71009 | 0.00027 |                                 |         |         |         |         |
|           |                  | §3a<br>§4        |            |            |                                 |         |  |                                   |         | 0.71026 | 0.000005                        | 2     |   |                                   |         |         |                                 |         | 0.71009 | 0.00037 |         |
| Chi       |                  | §2b              | 1.35       | 1814       |                                 |         |  |                                   |         |         |                                 |       |   |                                   | 0.70514 | 0.00011 |                                 |         |         |         |         |
|           |                  | §3a<br>§3b<br>§4 |            |            |                                 |         |  |                                   |         | 0.70551 | 0.00002                         | 2     |   |                                   |         |         |                                 | 0.70552 | 0.00018 | 0.70576 | 0.00018 |
| H6        |                  | §2b              | 1.34       | 127        |                                 |         |  |                                   |         |         |                                 |       |   |                                   | 0.70927 | 0.00066 |                                 |         | 0.71058 | 0.00061 |         |
|           |                  | §3a<br>§3b<br>§4 |            |            |                                 |         |  |                                   |         | 0.70988 | 0.00001                         | 2     |   |                                   |         |         |                                 |         | 0.70976 | 0.00062 |         |
| HAPp1     |                  | §3b<br>§4        | 0.03       | 63         |                                 |         |  |                                   | 0.70798 | 0.00003 | 3                               |       |   |                                   |         |         |                                 |         | 0.70688 | 0.00098 |         |
| HAPp2     |                  | §3b<br>§4        | 0.03       | 998        |                                 |         |  |                                   | 0.70871 | 0.00003 | 3                               |       |   |                                   |         |         |                                 |         | 0.70915 | 0.00018 |         |
| MAPS4     |                  | §3b              | 0.04       | 1791       |                                 |         |  |                                   |         |         |                                 |       |   |                                   |         |         |                                 |         |         | 0.70837 | 0.00013 |
|           |                  | §4               |            |            |                                 |         |  |                                   |         | 0.70779 | 0.00001                         | 4     |   |                                   |         |         |                                 |         |         |         |         |
| MAPS5     |                  | §3b<br>§4        | 0.04       | 165        |                                 |         |  |                                   | 0.70790 | 0.00003 | 4                               |       |   |                                   |         |         |                                 |         | 0.70790 | 0.00055 |         |
| MD1       |                  | §2b              | 0.06       | 353        |                                 |         |  |                                   |         |         |                                 |       |   |                                   | 0.71064 | 0.00059 |                                 |         |         |         |         |
|           |                  | §3a<br>§4        |            |            |                                 |         |  |                                   |         | 0.71075 | 0.00006                         | 3     |   |                                   |         |         |                                 |         |         | 0.71094 | 0.00095 |
| MD2       |                  | §2b              | 0.02       | 179        |                                 |         |  |                                   |         |         |                                 |       |   |                                   | 0.71123 | 0.00016 |                                 |         |         |         |         |
|           |                  | §3a<br>§4        |            |            |                                 |         |  |                                   |         | 0.71182 | 0.000004                        | 3     |   |                                   |         |         |                                 |         |         | 0.71192 | 0.00013 |
| MD3       |                  | §2b              | 0.05       | 691        |                                 |         |  |                                   |         |         |                                 |       |   |                                   | 0.70353 | 0.00025 |                                 |         |         |         |         |
|           |                  | §3a<br>§4        |            |            |                                 |         |  |                                   |         | 0.70401 | 0.00006                         | 3     |   |                                   |         |         |                                 |         |         | 0.70412 | 0.00028 |
| PRT-1     | §2b<br>§4        | 0.16             | 7978       |            |                                 |         |  | 0.72125                           | 0.00002 | 4       |                                 |       |   | 0.72134                           | 0.00042 |         |                                 |         |         |         |         |
| SRM1400   | §2b              | 0.44             | 238        |            |                                 |         |  |                                   |         |         |                                 |       |   | 0.71280                           | 0.00062 |         |                                 |         |         |         |         |
|           | §3a              |                  |            |            |                                 |         |  |                                   |         |         |                                 |       |   |                                   |         |         |                                 |         | 0.71387 | 0.00045 |         |
|           | §3b<br>§4        |                  |            |            |                                 |         |  |                                   | 0.71310 | 0.00001 | 4                               |       |   |                                   |         |         |                                 |         | 0.71325 | 0.00062 |         |
| SRM915b   | §2b              | 0.02             | 205        |            |                                 |         |  |                                   |         |         |                                 |       |   | 0.70811                           | 0.00012 |         |                                 |         |         |         |         |
|           | §3a<br>§3b<br>§4 |                  |            |            |                                 |         |  |                                   |         |         |                                 |       |   |                                   |         |         |                                 |         | 0.70806 | 0.00020 | 0.70819 |

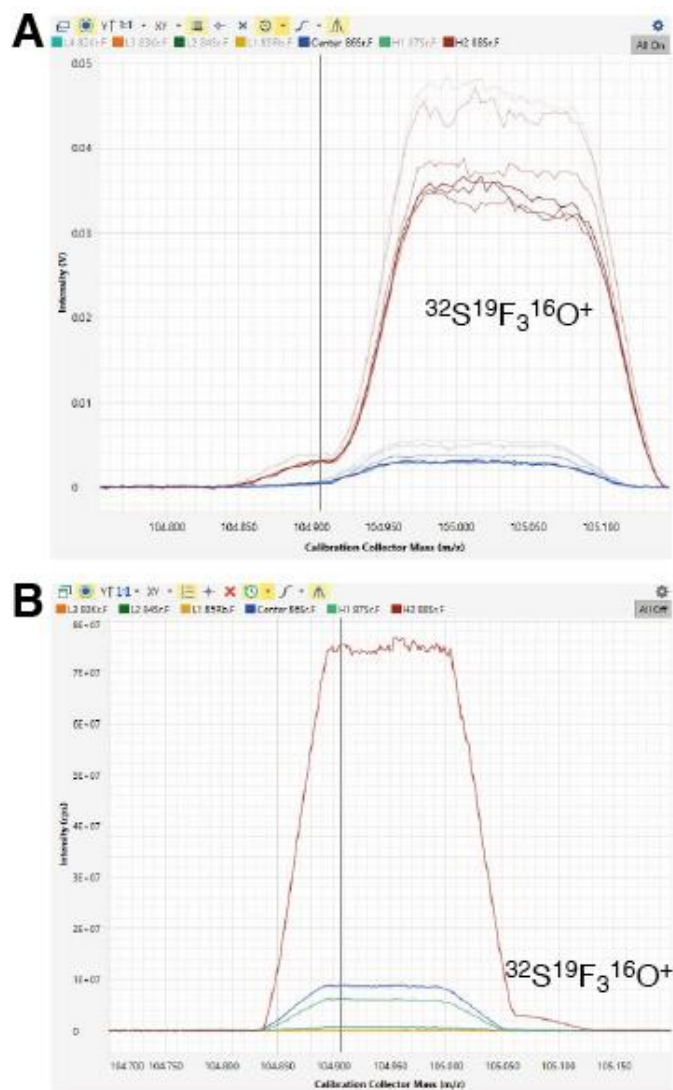

**Fig. S1:** Peak scans using the low ( $\Delta M/M \sim 3000$ ) resolution slit with SF<sub>6</sub> set at 0.12 L/min. Corresponding isobar for a given trace colour is indicated in the Qtegra software. A) Peak scan in blank solution (HNO<sub>3</sub> 2%) showing the isobaric  $^{32}\text{S}^{19}\text{F}_3^{16}\text{O}^+$  interference on  $^{88}\text{Sr}^{19}\text{F}^+$ . Screen captures were used to show the evolution of the signal through time using the “back trace” option. B) Peak scan in SRM-987 at 200 ppb. The isobaric  $^{32}\text{S}^{19}\text{F}_3^{16}\text{O}^+$  interference is still visible on the low-mass shoulder. Sr isotope ratio measurement was performed on a flat, interference-free plateau of ca. 0.02 amu width on the low-mass shoulder.

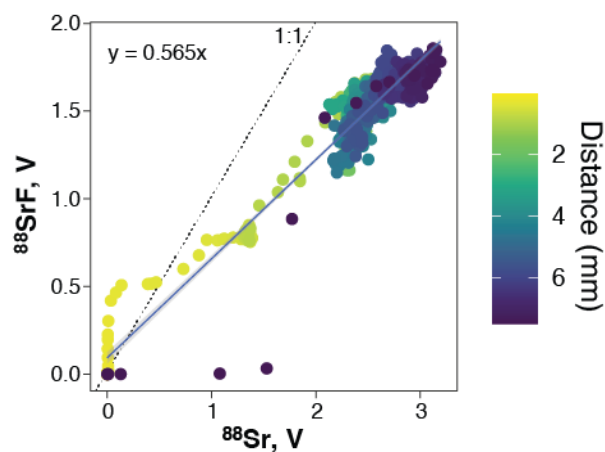

**Fig.S2:** Correlation between the measured  $^{88}\text{SrF}$  and  $^{88}\text{Sr}$  intensities in Exp. #3 (Table 1) as a function of the position in the profile, showing that when  $\text{SF}_6$  is introduced in the reaction/collision cell, the transmission drops by about half.

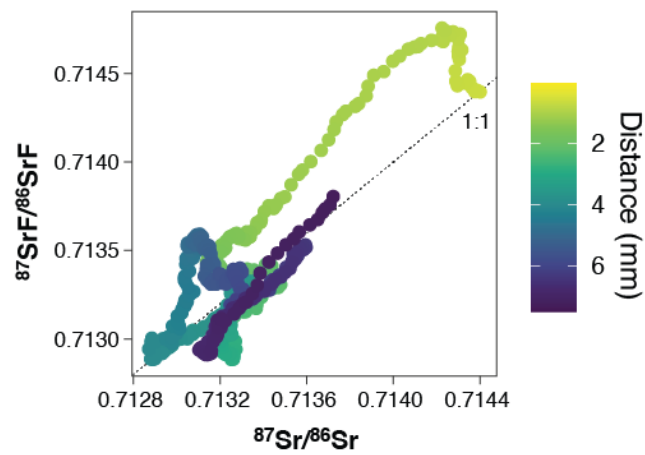

**Fig.S3:** Correlation between the measured moving average  $^{87}\text{SrF}/^{86}\text{SrF}$  and  $^{87}\text{Sr}/^{86}\text{Sr}$  ratios in Exp. #3 (Table 1) as a function of the position in the profile, showing scattering around the identity line and extended variability of the  $^{87}\text{SrF}/^{86}\text{SrF}$  ratio compared to the  $^{87}\text{Sr}/^{86}\text{Sr}$  ratio.
